# Supplementary material for: High-resolution quantification of atmospheric CO 2 mixing ratios in the Greater Toronto Area, Canada
Source: Copernicus journal article supplement (doi:10.5194/acp-2017-678), 2017-07-26
Supplement: Supplementary file 1 [file acp-2017-678-supplement.pdf]

**Supplemental for:**

**High-resolution quantification of atmospheric CO<sub>2</sub> mixing ratios in Greater Toronto Area, Canada**

Stephanie C. Pugliese<sup>1</sup>, Jennifer G. Murphy<sup>1\*</sup>, Felix R. Vogel<sup>2,4</sup>, Michael D. Moran<sup>3</sup>, Junhua Zhang<sup>3</sup>, Qiong Zheng<sup>3</sup>, Craig A. Stroud<sup>3</sup>, Shuzhan Ren<sup>3</sup>, Douglas Worthy<sup>4</sup>, Gregoire Broquet<sup>2</sup>

<sup>1</sup> University of Toronto, Department of Chemistry, 80 St. George St, Toronto, ON, Canada M5S 3H6

<sup>2</sup> Laboratoire des Sciences du Climat et de L'Environnement, CEA-CNRS-UVSQ, Université de Paris-Saclay, France

<sup>3</sup> Environment Canada, Air Quality Research Division, 4905 Dufferin St. Toronto, ON, Canada M3H 5T4

<sup>4</sup> Environment Canada, Climate Research Division, 4905 Dufferin St. Toronto, ON, Canada M3H 5T4

\*Correspondence author. Email address: [jmurphy@chem.utoronto.ca](mailto:jmurphy@chem.utoronto.ca) (J.G. Murphy)

**Table S1: Facility-specific CO<sub>2</sub>:CO for the Point sector**

| <b>Name</b>                                         | <b>CO<sub>2</sub><br/>(kt)</b> | <b>CO<br/>(kt)</b> | <b>CO<sub>2</sub>:CO<br/>(kt CO<sub>2</sub>/kt CO)</b> |
|-----------------------------------------------------|--------------------------------|--------------------|--------------------------------------------------------|
| Brighton Beach                                      | 233.3                          | 0.28               | 842                                                    |
| Bruce Power                                         | 69.0                           | 0.03               | 2091                                                   |
| Cardinal Power                                      | 562.1                          | 0.06               | 9527                                                   |
| Cochrane Generating Station                         | 1113.3                         | 0.34               | 3323                                                   |
| East Windsor Cogeneration Center                    | 124.3                          | 0.05               | 2345                                                   |
| Essar Power Canada Ltd.                             | 1502.4                         | 0.48               | 3137                                                   |
| Goreway Power Station                               | 1209.8                         | 0.72               | 1680                                                   |
| Greenfield Energy Center                            | 937.9                          | 2.18               | 431                                                    |
| Halton Hills Generating Station                     | 397.0                          | 0.07               | 5839                                                   |
| Iroquois Falls Generating Station                   | 321.0                          | 0.07               | 4864                                                   |
| Kapuskasing Power Plant                             | 136.6                          | 0.03               | 4268                                                   |
| Kingston Cogen                                      | 332.0                          | 0.05               | 6775                                                   |
| Kirkland Lake Generating Station                    | 321.9                          | 0.63               | 513                                                    |
| Lake Superior Power                                 | 203.1                          | 0.06               | 3692                                                   |
| Lambton Generating Station                          | 3289.9                         | 1.41               | 2337                                                   |
| Lennox Generating Station                           | 120.1                          | 0.07               | 1819                                                   |
| Mississauga Cogeneration Plant                      | 363.8                          | 0.13               | 2756                                                   |
| Nanticoke Generating Station                        | 8544.1                         | 3.40               | 2513                                                   |
| North Bay                                           | 133.5                          | 0.03               | 4170                                                   |
| Ottawa Health Sciences Center Cogeneration Facility | 220.0                          | 0.07               | 3013                                                   |
| Plasco Trail Road                                   | 3.2                            | 0.02               | 154                                                    |
| Portlands Energy Centre                             | 457.3                          | 0.34               | 1333                                                   |
| Sarnia Cogen Plant                                  | 362.4                          | 0.22               | 1618                                                   |
| Sarnia Regional Cogeneration Facility               | 1194.2                         | 0.40               | 2971                                                   |
| St. Clair Energy Center                             | 357.6                          | 0.29               | 1216                                                   |
| Thorold Cogen Generating Station                    | 305.5                          | 0.20               | 1543                                                   |
| Tunis Power Plant                                   | 109.3                          | 0.08               | 1401                                                   |
| Whitby Cogeneration                                 | 189.3                          | 0.09               | 2175                                                   |
| Windsor Essex Cogeneration Plant                    | 202.1                          | 0.07               | 2846                                                   |
| Hagersville Mine                                    | 52.0                           | 0.04               | 1406                                                   |
| Beachville Operation                                | 487.6                          | 0.24               | 2008                                                   |
| Dundas Operation                                    | 406.4                          | 0.23               | 1744                                                   |
| Northern Lime Limited                               | 90.8                           | 0.09               | 1032                                                   |
| Copper Cliff Nickel Refinery                        | 51.3                           | 0.03               | 1654                                                   |
| Copper Cliff Smelter                                | 201.1                          | 0.10               | 1971                                                   |
| Mississauga Lubricants Center - Petro-Canada        | 365.04                         | 0.08               | 4680                                                   |
| Nanticoke Refinery - Imperial Oil                   | 1058.08                        | 7.83               | 135                                                    |
| Sarnia Manufacturing Center                         | 759.47                         | 0.34               | 2234                                                   |
| Sarnia Refinery- Suncor                             | 628.00                         | 4.69               | 134                                                    |

|                                      |         |      |      |
|--------------------------------------|---------|------|------|
| Sarnia Refinery Plant - Imperial Oil | 1270.44 | 2.43 | 523  |
| Dofasco Hamilton                     | 4939.9  | 9.23 | 535  |
| Essar Steel Algoma Inc.              | 2219.1  | 0.90 | 2468 |
| Gerdau Whitby                        | 83.7    | 0.28 | 295  |
| Hamilton Works - U.S. Steel Canada   | 2674.7  | 2.45 | 1093 |
| Ivaco Rolling Mills                  | 74.5    | 0.20 | 369  |
| Lake Erie Works - U.S. Steel Canada  | 1387.6  | 1.49 | 931  |

---

**Table S2: Grouping of EDGAR v4.2 SNAP sectors to SOCE inventory sectors**

| <b>SOCE Sector</b> | <b>EDGAR v4.2 SNAP Sectors</b>                   |
|--------------------|--------------------------------------------------|
| Area               | $1A4 + (6A+6C) + 1A2 + 1A1a + 2C + 2A$           |
| Point              | $1B2a + (4C+4D) + (2B+3) + 1A2 + 1A1a + 2C + 2A$ |
| Marine             | 1A3d                                             |
| On-road            | 1A3b                                             |
| Off-road           | $1A3a + 1A3c + 1A3e + 1A3d$                      |

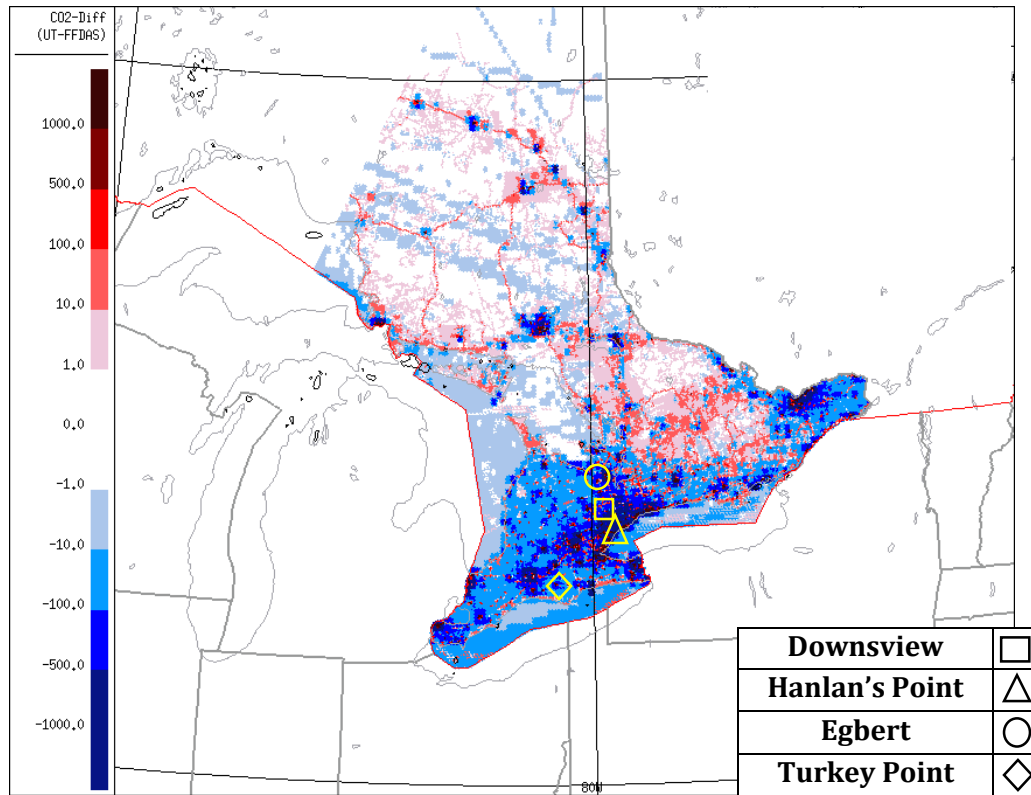

**Figure S1: Annual mean difference in anthropogenic CO<sub>2</sub> emissions (units: g CO<sub>2</sub>/second/grid cell) between the SOCE and the FFDAS v2 inventories (SOCE - FFDAS v2) for a weekday in February 2010. Locations of in-situ measurements of CO<sub>2</sub> are shown**

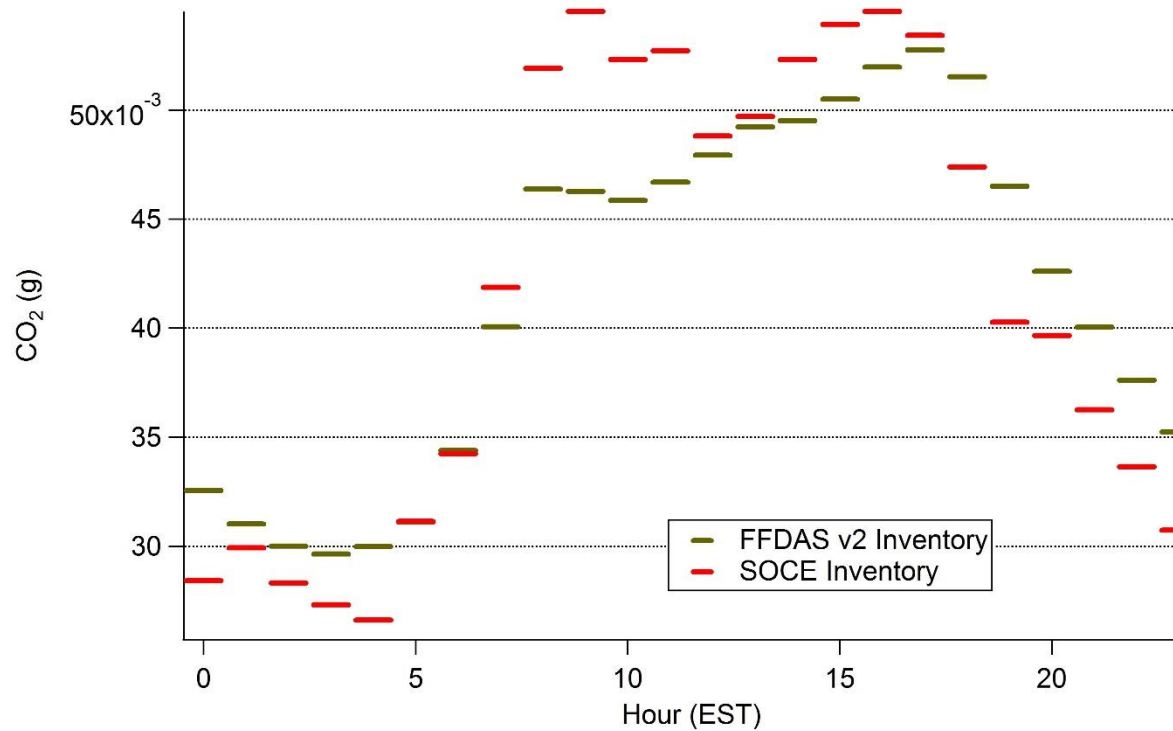

**Figure S2: Diurnal profile of CO<sub>2</sub> emissions (grams) estimated by the FFDAS v2 and SOCE inventories for January-March for the black-box domain in Figure 2a.**

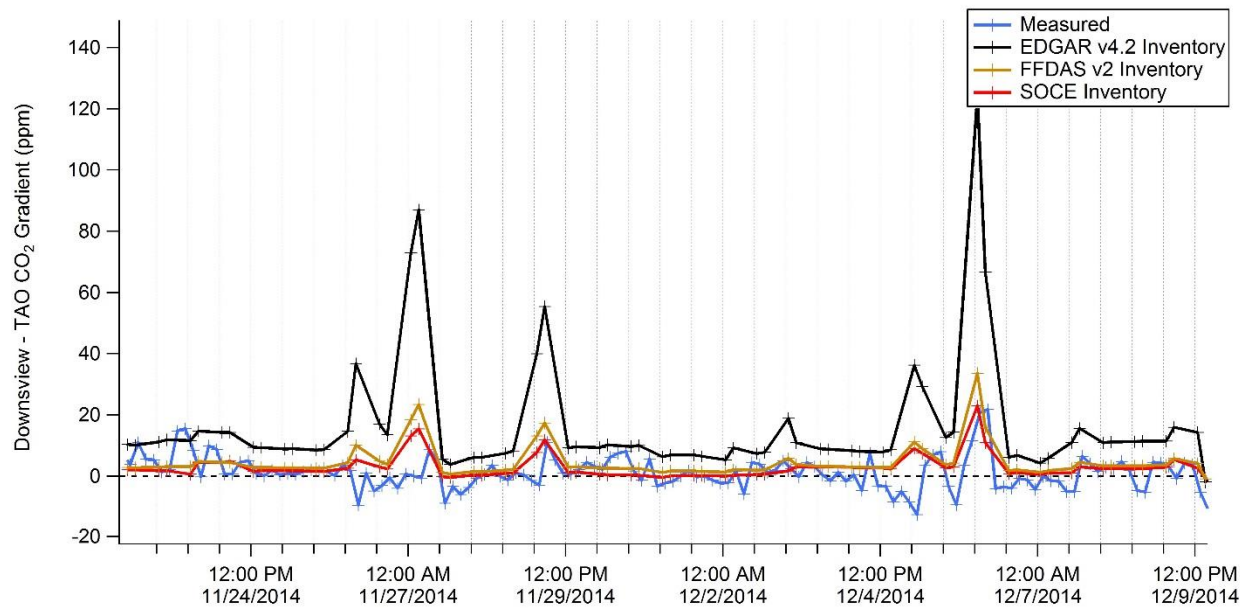

**Figure S3: Time series of measured (blue) and modelled Downsview - TAO gradient CO<sub>2</sub> mixing ratios. The black, red and gold lines are the modelled mixing ratios when using the EDGAR v4.2, FFDAS v2 and SOCE CO<sub>2</sub> inventories, respectively.**

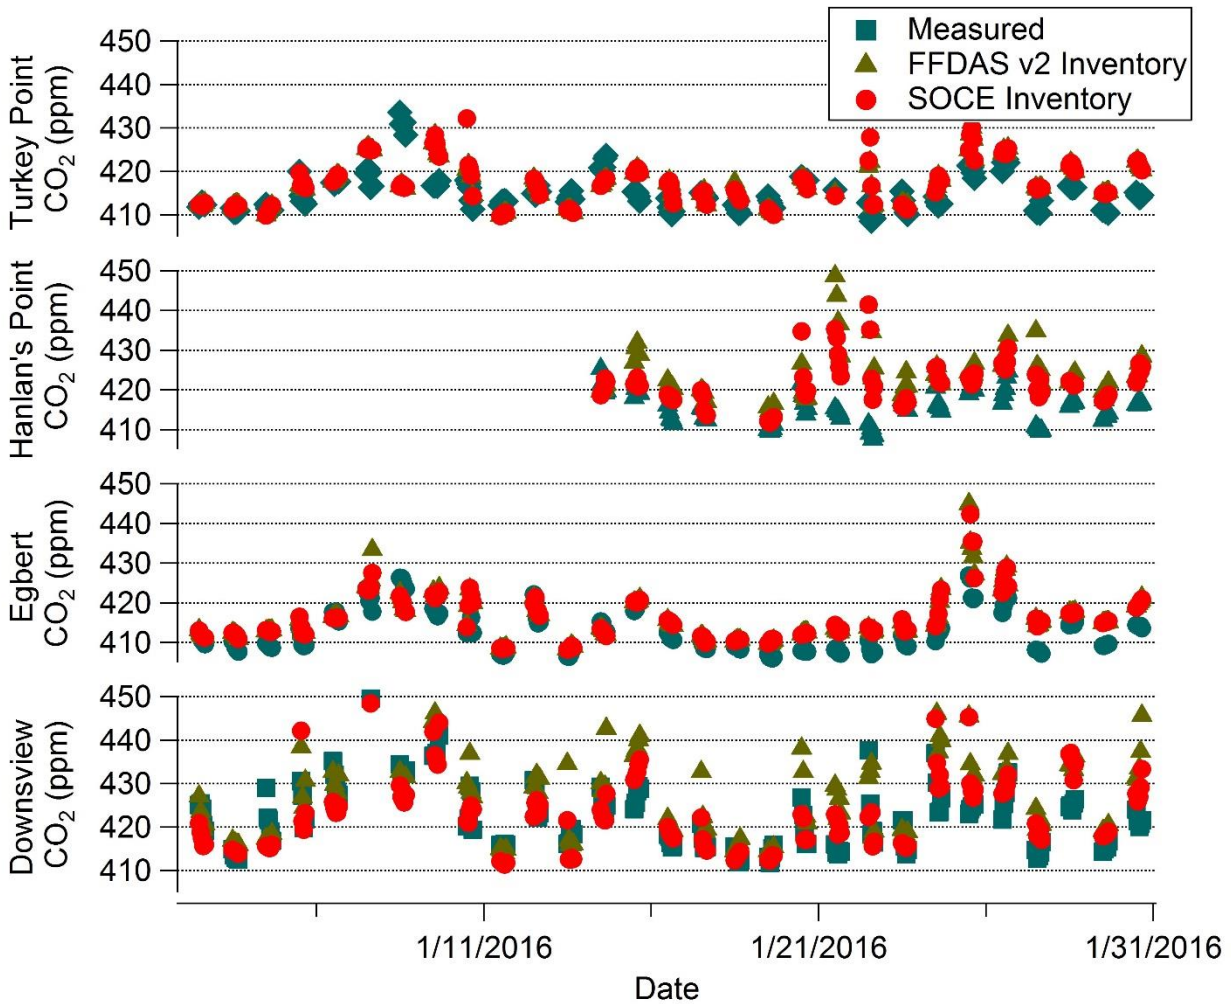

**Figure S4: Time series of measured (blue) and modelled January afternoon (12:00-16:00 EST) CO<sub>2</sub> mixing ratios for the four sites used in this study. The red and gold markers are the modelled mixing ratios when using the SOCE CO<sub>2</sub> inventory and the FFDAS v2 inventory, respectively.**



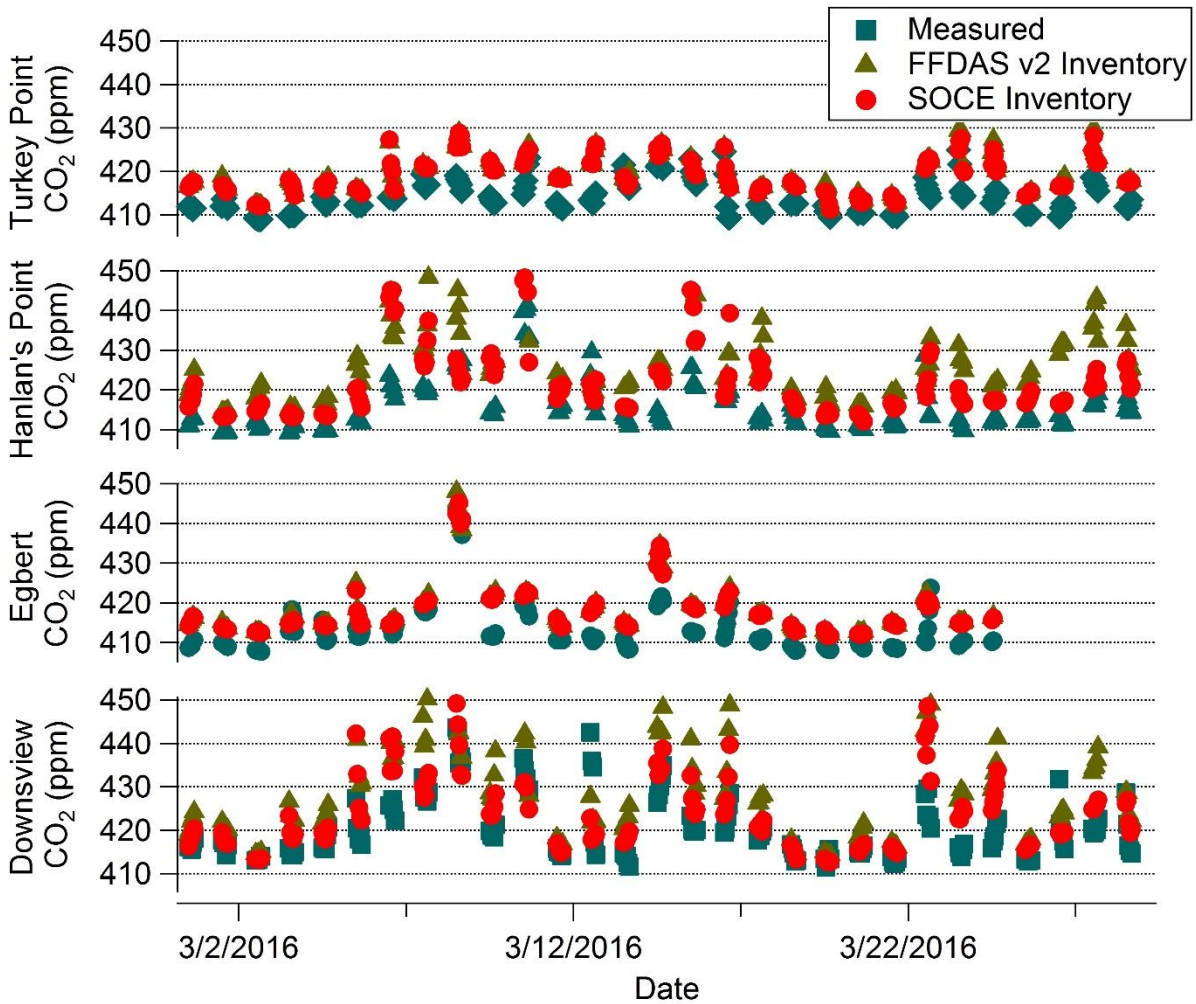

**Figure S5: Time series of measured (blue) and modelled March afternoon (12:00-16:00 EST) CO<sub>2</sub> mixing ratios for the four sites used in this study. The red and gold markers are the modelled mixing ratios when using the SOCE CO<sub>2</sub> inventory and the FFDAS v2 inventory, respectively.**

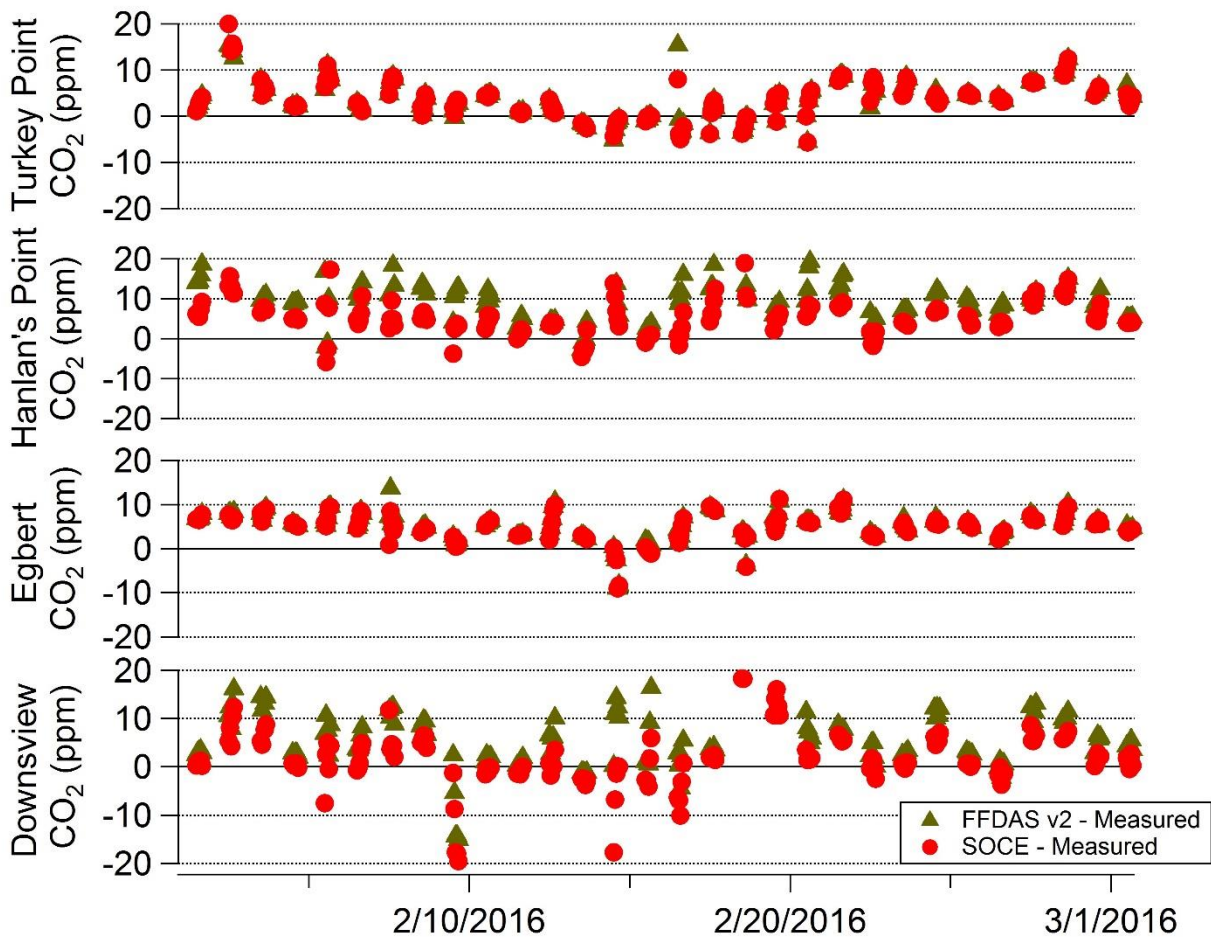

**Figure S6: Time series of the difference between modelled and measured CO<sub>2</sub> mixing ratios in February (12:00-16:00 EST) for the four sites used in this study. The red and gold markers are the differences when using the SOCE CO<sub>2</sub> inventory and the FFDAS v2 inventory, respectively.**

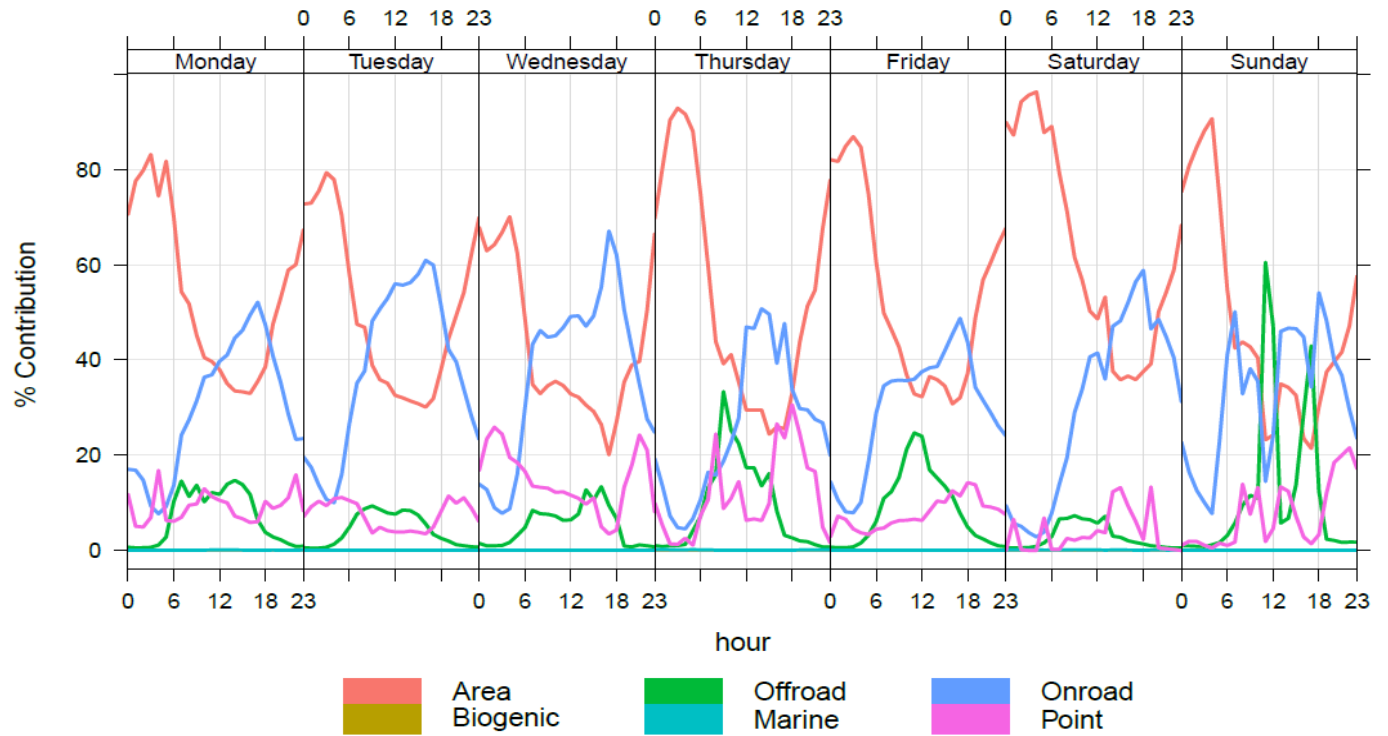

**Figure S7: Modelled sectoral percent contributions to diurnal local CO<sub>2</sub> enhancement for January 2016 at Downsview averaged by day of week. Note: Area = Area + Residential natural gas combustion + Commercial natural gas combustion. (Time zone is EST).**

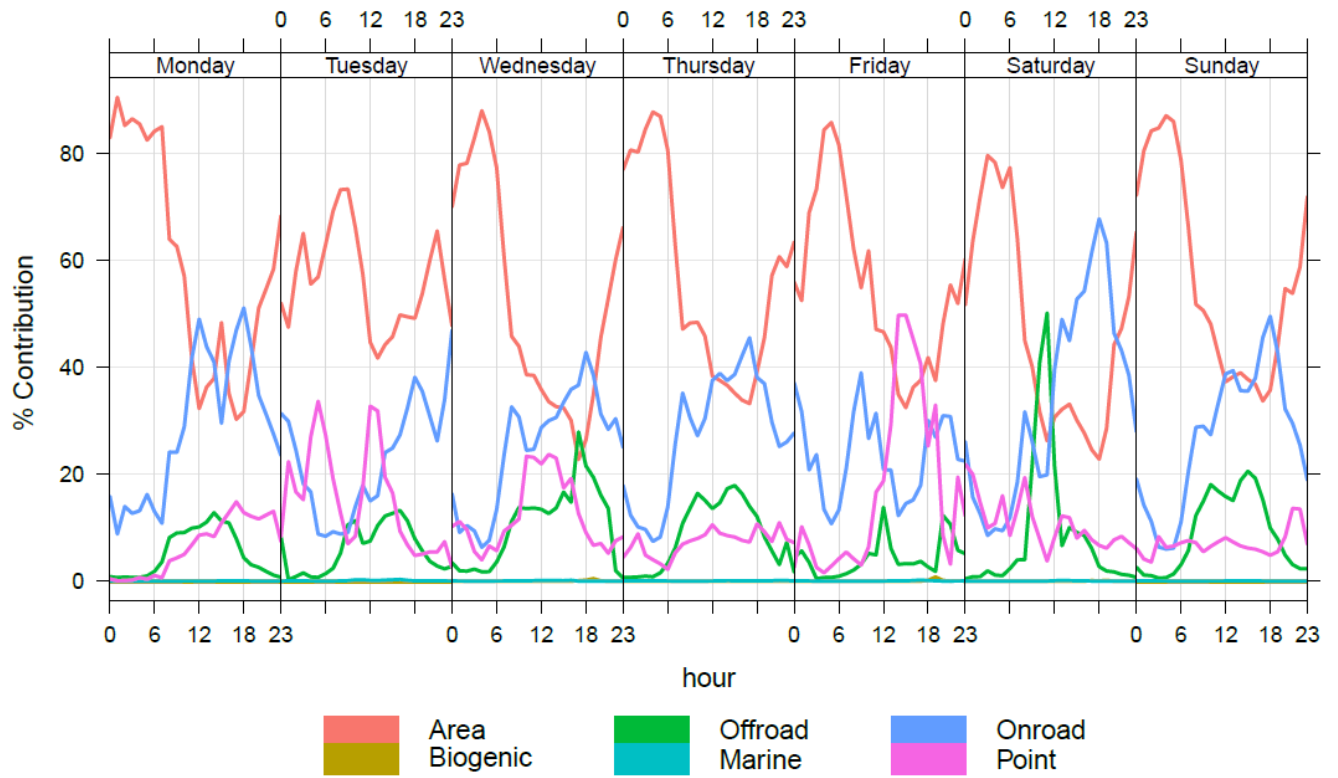

**Figure S8: Modelled sectoral percent contributions to diurnal local CO<sub>2</sub> enhancement for March 2016 at Downsview averaged by day of week. Note: Area = Area + Residential natural gas combustion + Commercial natural gas combustion. (Time zone is EST).**
